# Supplementary material for: A Highly Porous Nonwoven Thermoplastic Polyurethane/Polypropylene-Based Triboelectric Nanogenerator for Energy Harvesting by Human Walking
Source: MDPI journal article supplement (doi:10.3390/polym12051044), 2020-05-02
Supplement: s1 [file s1]

**Supporting information,**

**S1.** The commercial 57 LEDs connected in series in the form of “KITECH” by using the energy generated by the N-TENG with human-walking without any charging system. (Video1)

<https://doi.org/10.5281/zenodo.3741388>
